# Supplementary material for: Ultra-thin carbon nanofiber networks derived from bacterial cellulose for capacitive deionization
Source: Royal Society of Chemistry journal article supplement (doi:10.1039/c5ta00435g), 2015-01-01
Supplement: c5ta00435g1.pdf [file c5ta00435g1.pdf]

# **Ultra-thin carbon nanofiber networks derived from bacterial-cellulose for capacitive deionization**

Yong Liu <sup>a</sup>, Ting Lu <sup>a</sup>, Zhuo Sun <sup>a</sup>, Daniel H. C. Chua <sup>b</sup>, Likun Pan <sup>a,\*</sup>

*<sup>a</sup>Engineering Research Center for Nanophotonics & Advanced Instrument,*

*Ministry of Education, Shanghai Key Laboratory of Magnetic Resonance, Department of Physics, East China Normal University, Shanghai 200062, China*

*<sup>b</sup>Department of Materials Science and Engineering, National University of Singapore 117574, Singapore*

---

\* Corresponding author. Tel: 86 21 62234132; Fax: 86 21 62234321; E-mail: lkpan@phy.ecnu.edu.cn

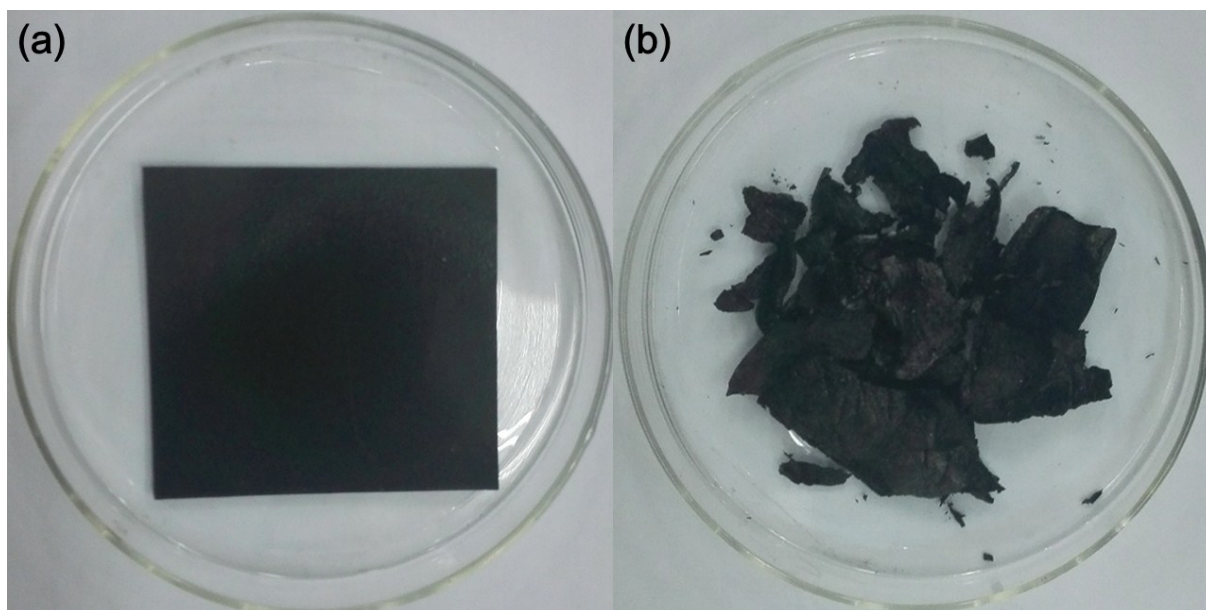

Fig. S1. Photograph of bc-CNFs treated at (a) 800 °C and (b) 1000 °C.

As shown in Fig S1, when the carbonization temperature was over 800 °C the free-standing structure of the bc-CNFs electrode was destroyed.

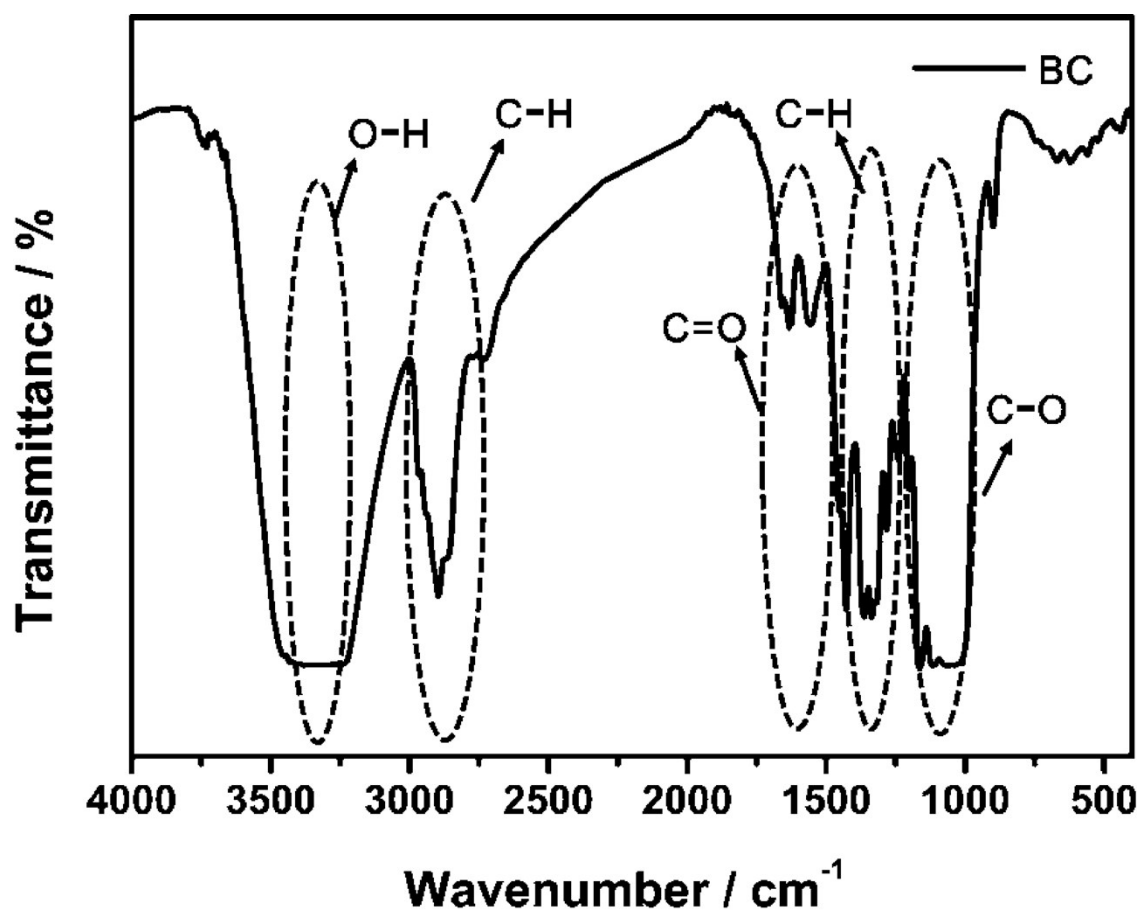

Fig. S2. FTIR spectrum of BC.

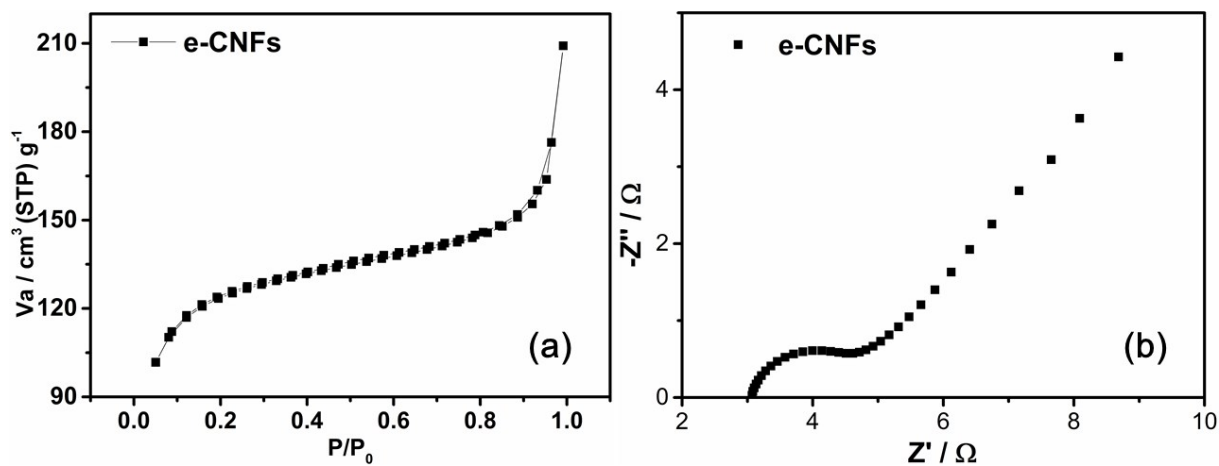

Fig. S3. (a) Nitrogen adsorption-desorption isotherm and (b) Nyquist plot of e-CNFs.

Nitrogen adsorption-desorption isotherm of e-CNFs is presented in Fig. S3 (a). The specific surface area of e-CNFs is  $410.0 \text{ m}^2 \text{ g}^{-1}$ , which is determined by the Brunauer-Emmett-Teller method. Fig. S3 (b) shows the Nyquist plots of e-CNFs electrode and the fitted  $R_{ct}$  of e-CNFs is  $2.35 \Omega$ .
